# Supplementary material
Source: ML conference proceedings conference paper supplement (https://www.ecva.net/papers/eccv_2020/papers_ECCV/html/123730766_ECCV_2020_paper.php)
Supplement: Supplementary file 1 [file 123730766-supp.zip]

Archive with 3 entries (3 files):
- Improving Optical Flow on a Pyramid Level - Supplementary Material.pdf
- Improving Optical Flow on a Pyramid Level - Supplementary Video.mp4
- Readme.txt
