# Supplementary material
Source: ML conference proceedings conference paper supplement (https://www.ecva.net/papers/eccv_2020/papers_ECCV/html/123730766_ECCV_2020_paper.php)
Supplement: Supplementary file 1 [file 123730766-supp.zip › Readme.txt]

Video Encoding:

Encoded with OpenShot video editor (uses FFMPEG)
libx264 5.00MB/s 
1280x720
30fps
no audio
